# Supplementary material for: An automated workflow for multiplexed single-cell proteomics sample preparation at unprecedented sensitivity
Source: bioRxiv or medRxiv preprint supplement (doi:10.1101/2021.04.14.439828), 2022-02-02
Supplement: Supplementary file [file media-1.pdf]

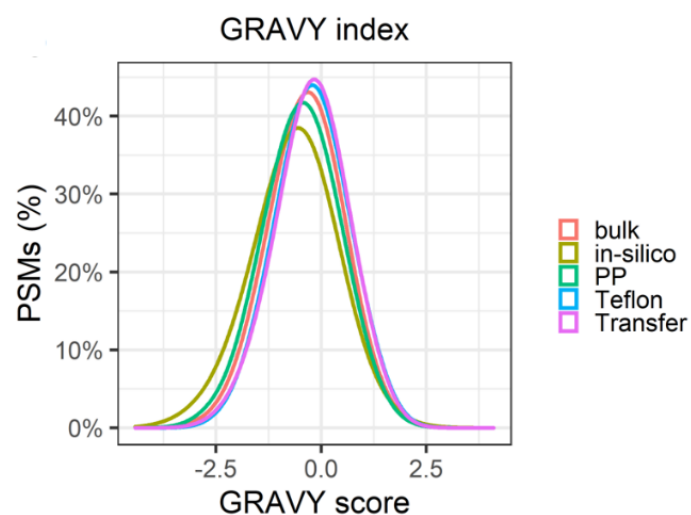

Supplemental Figure 1: Gravy index of hydrophathy of bulk HeLa digest in glass vials (bulk), in-silico digested human FASTA (in-silico), HeLa cells prepared standard plastic ware (PP), the proteoCHIP (PTFE) and prepared in the proteoCHIP but transferred to a standard PCR vial for injection (Transfer) across all PSMs.

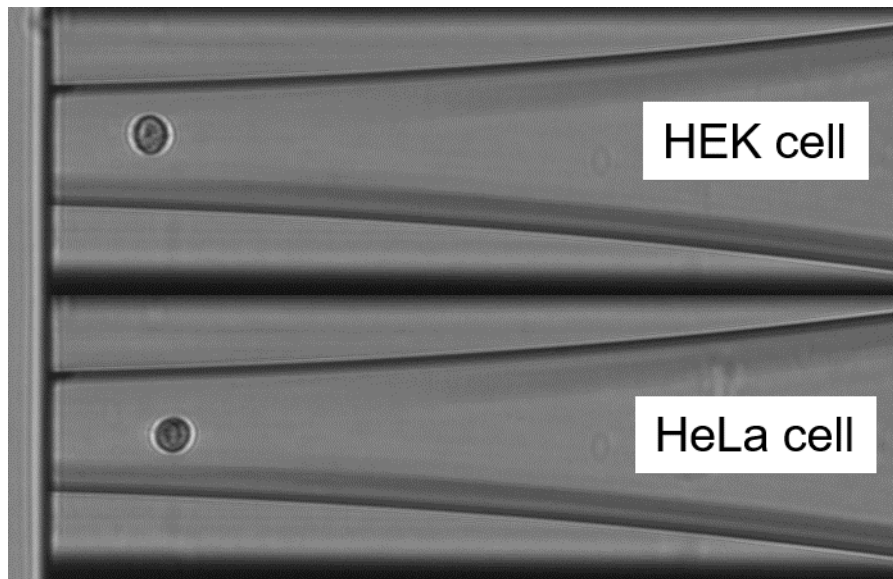

Supplemental Figure 2: Image of a HEK and a HeLa cell during image-based cell sorting using the cellenONE®.
